# Supplementary material
Source: PubMed Central journal article supplement (PMC5622245)
Supplement: ajtr0009-4003-f8.pdf [file ajtr0009-4003-f8.pdf]

## SOX12 in lung cancer

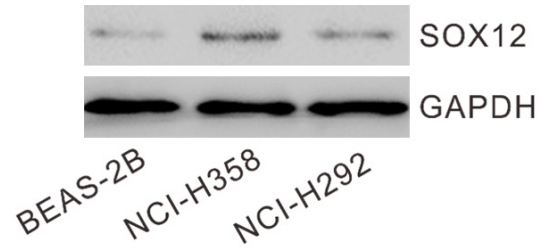

**Figure S1.** SOX12 protein levels were determined in BEAS-2B (a human normal bronchial epithelial cell line), NCI-H358 and NCI-H292 cells by Western blot.

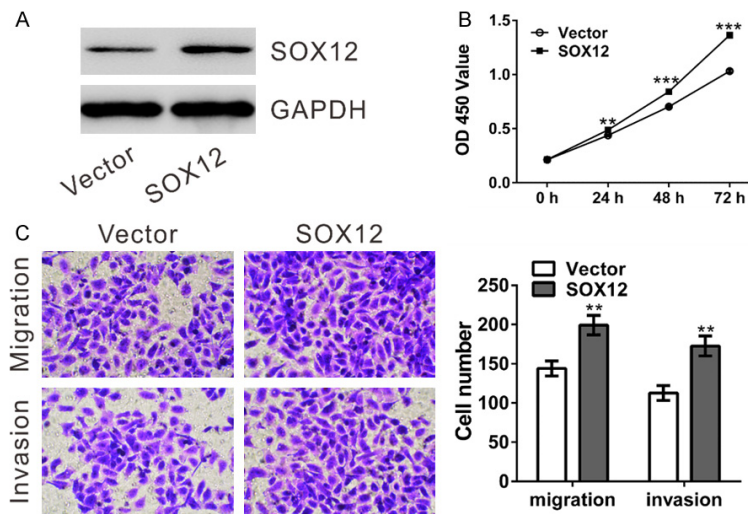

**Figure S2.** Effects of SOX12 overexpression on cell proliferation, migration and invasion of NCI-H292 cells. The full-length SOX12 were cloned into pCDNA3.1 vector. NCI-H292 cells were transfected with pCDNA3.1-SOX12 (SOX12) or control Vector. A. Validation of SOX12 overexpression by Western blot at 48 h post transfection. B. Cell proliferation was assessed by CCK-8 assay. C. Cell migration and invasion was evaluated by Transwell assays. \*\* $P < 0.01$  and \*\*\* $P < 0.001$  VS Vector.
